# Supplementary material for: Multiple detection of single nucleotide polymorphism by microarray-based resonance light scattering assay with enlarged gold nanoparticle probes
Source: Royal Society of Chemistry journal article supplement (doi:10.1039/c5an02510a), 2016-01-01
Supplement: c5an02510a1.pdf [file c5an02510a1.pdf]

Electronic Supplementary Information (ESI) for:

**Multiple Detection of Single Nucleotide Polymorphism by  
Microarray-Based Resonance Light Scattering Assay with Enlarged  
Gold Nanoparticle Probes**

Jiaxue Gao,<sup>ac</sup>Lan Ma,<sup>a,b</sup>Zhen Lei,<sup>ac</sup>Zhenxin Wang<sup>\*a</sup>

*<sup>a</sup>State Key Laboratory of Electroanalytical Chemistry, Changchun Institute of Applied Chemistry, Chinese Academy of Sciences, Changchun, 130022, P. R. China.*

*<sup>b</sup>Analysis and Testing Center, Ningxia University, Yinchuan, 750021, P. R. China*

*<sup>c</sup>University of the Chinese Academy of Sciences, Beijing, 100049, P. R. China.*

\* Corresponding author: Phone/Fax: (+86) 431-85262243. E-mail: wangzx@ciac.ac.cn.

**Contents:**

Supplementary Table S1 and S2

Supplementary Figure S1 to S9

**Table S1.** Sequences of oligonucleotides in the assay

| Name | Sequence (5' to 3')                                               | Functionality                       |
|------|-------------------------------------------------------------------|-------------------------------------|
| P1   | 5'-NH <sub>2</sub> -C <sub>6</sub> -TTTTTTTTTTCTGTCGAATTATTTAGTAT | Probe ssDNA for T1                  |
| P2   | 5'-NH <sub>2</sub> -C <sub>6</sub> -TTTTTTTTTTGGTTAGCAGCAGC       | Probe ssDNA for T2                  |
| P3   | 5'-NH <sub>2</sub> -C <sub>6</sub> -TTTTTTTTTTGAGTGACTGAGTACAG    | Probe ssDNA for T3                  |
| P4   | 5'-NH <sub>2</sub> -C <sub>6</sub> -TTTTTTTTTTTTTAAATCACGTTTAAACA | Probe ssDNA for T4                  |
| T1   | CTGTCTTGCCAGTGATACTAAAT <u>T</u> AATTCGACAG                       | Target ssDNA with 16q12.1 mutant    |
| T2   | AAGACCTGGCTTCTAGCTGCT <u>G</u> CTAACC                             | Target ssDNA with 1q32.1 mutant     |
| T3   | GTATCATTGCAAAACTCCTGTACT <u>C</u> AGTCACTC                        | Target ssDNA with 5q14.3 mutant     |
| T4   | AGGGTCAAGGTTTTCTGTAAAC <u>G</u> TGATTTAAA                         | Target ssDNA with , 15q26.1 mutant  |
| S1   | CTGTCTTGCCAGTGATACTAAAC <u>C</u> AATTCGACAG                       | Target ssDNA with 16q12.1 wild type |
| S2   | AAGACCTGGCTTCTAGCTGCT <u>A</u> CTAACC                             | Target ssDNA with 1q32.1 wild type  |
| S3   | GTATCATTGCAAAACTCCTGTACT <u>T</u> AGTCACTC                        | Target ssDNA with 5q14.3 wild type  |
| S4   | AGGGTCAAGGTTTTCTGTAAAC <u>A</u> TGATTTAAA                         | Target ssDNA with 15q26.1 wild type |
| L1   | CACTGGCAAGACAGTTTTTTTTTTT-C <sub>6</sub> -SH-3'                   | ssDNA for GNP modification          |
| L2   | TAGAAGCCAGGTCTTTTTTTTTTTT-C <sub>6</sub> -SH-3'                   | ssDNA for GNP modification          |

---

|     |                                                                   |                            |
|-----|-------------------------------------------------------------------|----------------------------|
| L3  | GAGTTTTGCAATGATACTTTTTTTTTT-C <sub>6</sub> -SH-3'                 | ssDNA for GNP modification |
| L4  | GAAAACCTTGACCCTTTTTTTTTTTT-C <sub>6</sub> -SH-3'                  | ssDNA for GNP modification |
| P1w | 5'-NH <sub>2</sub> -C <sub>6</sub> -TTTTTTTTTTCTGTCGAATTGTTTAGTAT | Probe ssDNA for S1         |
| P2w | 5'-NH <sub>2</sub> -C <sub>6</sub> -TTTTTTTTTTGGTTAGTAGCAGC       | Probe ssDNA for S2         |
| P3w | 5'-NH <sub>2</sub> -C <sub>6</sub> -TTTTTTTTTTGAGTGACTAAGTACAG    | Probe ssDNA for S3         |
| P4w | 5'-NH <sub>2</sub> -C <sub>6</sub> -TTTTTTTTTTTTTAAATCATGTTTAAACA | Probe ssDNA for S4         |
| F1  | TCTGTCTTGCCAGTGATACTAAAT                                          | Forward primer for 16q12.1 |
| R1  | GACTCAATGGGTGGAGGTGT                                              | Reverse primer for 16q12.1 |
| F2  | GACCAGGCTTCTAGCTGCTG                                              | Forward primer for 1q32.1  |
| R2  | TGGAGGACATTCCCGAACTC                                              | Reverse primer for 1q32.1  |
| F3  | TATCATTCCAAAACCTCCTGTACTC                                         | Forward primer for 5q14.3  |
| R3  | CAGTTCGGACTTTGTACCTG                                              | Reverse primer for 5q14.3  |
| F4  | GGTCAAGGTCTTCTGTAAACG                                             | Forward primer for 15q26.1 |
| R4  | GACGCAGGAATACCTATCAT                                              | Reverse primer for 15q26.1 |
| f1  | TCTGTCTTGCCAGTGATACTAAAT                                          | Forward primer for 16q12.1 |
| r1  | AGGGTGGTATGTGGTTTTGC                                              | Reverse primer for         |

---

---

|    |                           |                               |
|----|---------------------------|-------------------------------|
|    |                           | 16q12.1                       |
| f2 | GACCTGACTTCTAGCTGCTG      | Forward primer for<br>1q32.1  |
| r2 | GTTACAGTAGTAACAACCTGAGTCC | Reverse primer for<br>1q32.1  |
| f3 | TATCATTCCAAAACCTCCTGTACTC | Forward primer for<br>5q14.3  |
| r3 | CACATCCACCAGAACCTACAAG    | Reverse primer for<br>5q14.3  |
| f4 | GGTCAAGGTCTTCTGTAAACG     | Forward primer for<br>15q26.1 |
| r4 | GGATTGTCAGCCCCTAAAGT      | Reverse primer for<br>15q26.1 |

---

Highlighted bases are the SNP sites.

**Table S2.** Experimental conditions of the gold enlargement.

| Subarray Number                   | 1    | 2   | 3   | 4    | 5    | 6   | 7   |
|-----------------------------------|------|-----|-----|------|------|-----|-----|
| HAuCl <sub>4</sub> / mM           | 0.05 | 0.2 | 0.5 | 0.5  | 0.2  | 0.2 | 0.2 |
| H <sub>2</sub> O <sub>2</sub> / M | 0.1  | 0.1 | 0.1 | 0.05 | 0.05 | 0.5 | 2.5 |

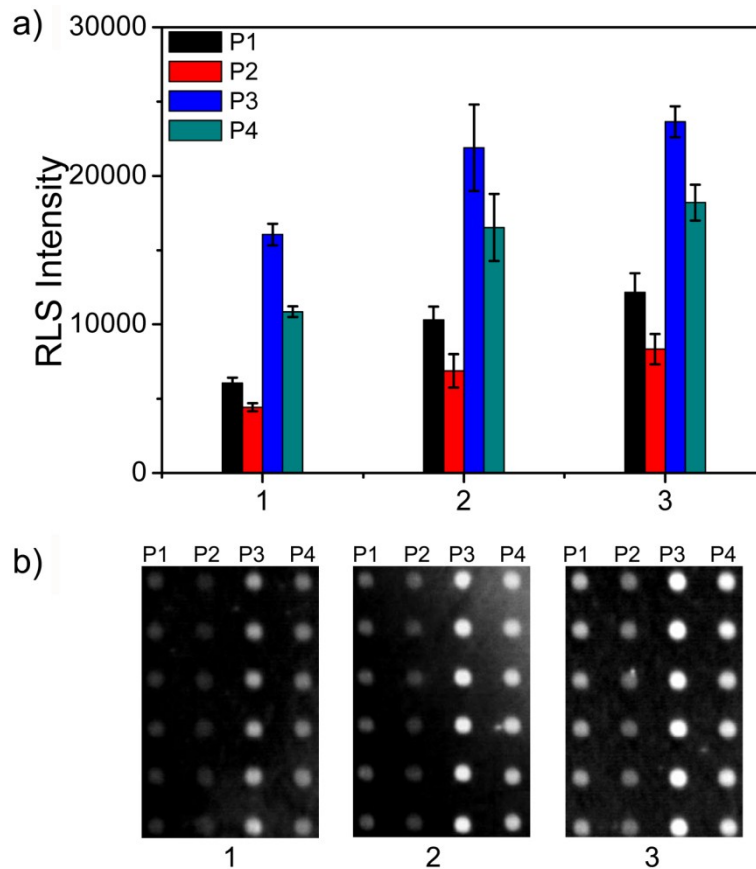

**Fig. S1.** RLS intensities (a) and corresponding images (b) of subarrays. The various concentrations of  $\text{HAuCl}_4$  are used for enlargement of GNPs. (as shown in Table S2). The concentrations of probe ssDNAs are  $10 \mu\text{M}$  in spotting solution which are immobilized on the subarrays as indicated. The concentration of total DNAs in the target ssDNA cocktail (T1:T2:T3:T4=1:1:1:1) is  $10 \text{ nM}$ , respectively. The concentration of DNA-GNPs is  $5 \text{ nM}$ .

Relative high RLS intensity and S/N have been obtained at  $0.5 \text{ mM}$   $\text{HAuCl}_4$  in the reaction mixture.

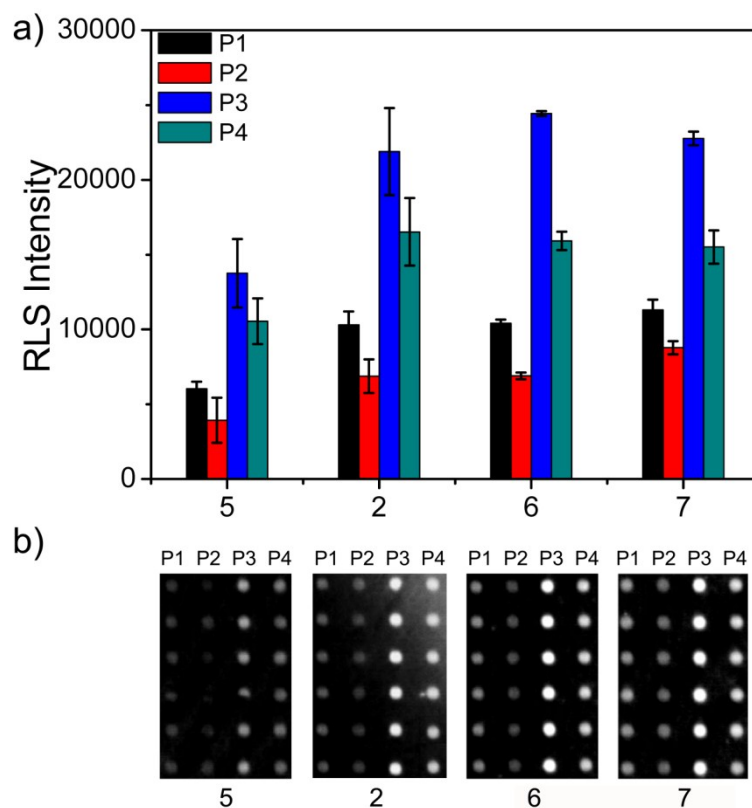

**Fig. S2.** RLS intensities (a) and corresponding images (b) of subarrays. The various concentrations of  $\text{H}_2\text{O}_2$  are used for enlargement of GNPs. (as shown in Table S2). The concentrations of probe ssDNAs are  $10 \mu\text{M}$  in spotting solution which are immobilized on the subarrays as indicated. The concentration of total DNAs in the target ssDNA cocktail ( $\text{T1}:\text{T2}:\text{T3}:\text{T4}=1:1:1:1$ ) is  $10 \text{ nM}$ , respectively. The concentration of DNA-GNPs is  $5 \text{ nM}$ .

In this case, relative high RLS intensity and S/N have been obtained at  $0.5 \text{ M H}_2\text{O}_2$  in the reaction mixture. However, there are significant differences among RLS signals from different target ssDNAs.

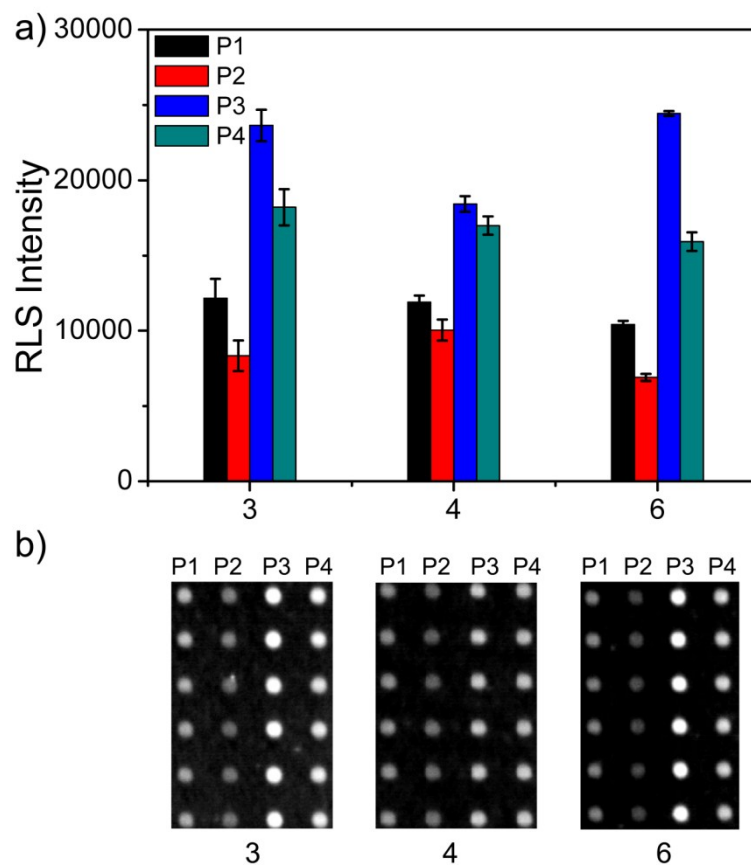

**Fig. S3.** RLS intensities (a) and corresponding images (b) of subarrays. The various concentrations of  $\text{H}_2\text{O}_2$  and  $\text{HAuCl}_4$  are used for enlargement of GNPs (as shown in Table S2). The concentrations of probe ssDNAs are  $10 \mu\text{M}$  in spotting solution which are immobilized on the subarrays as indicated. The concentration of total DNAs in the target ssDNA cocktail (T1:T2:T3:T4=1:1:1:1) is  $10 \text{ nM}$ , respectively. The concentration of DNA-GNPs is  $5 \text{ nM}$ .

Because relative homogenous RLS intensity and S/N have been obtained at  $0.5 \text{ mM}$   $\text{HAuCl}_4$  and  $0.05 \text{ M}$   $\text{H}_2\text{O}_2$  in the reaction mixture (No. 4), the following experiments are performed in this experimental condition ( $0.5 \text{ mM}$   $\text{HAuCl}_4$  and  $0.05 \text{ M}$   $\text{H}_2\text{O}_2$ ).



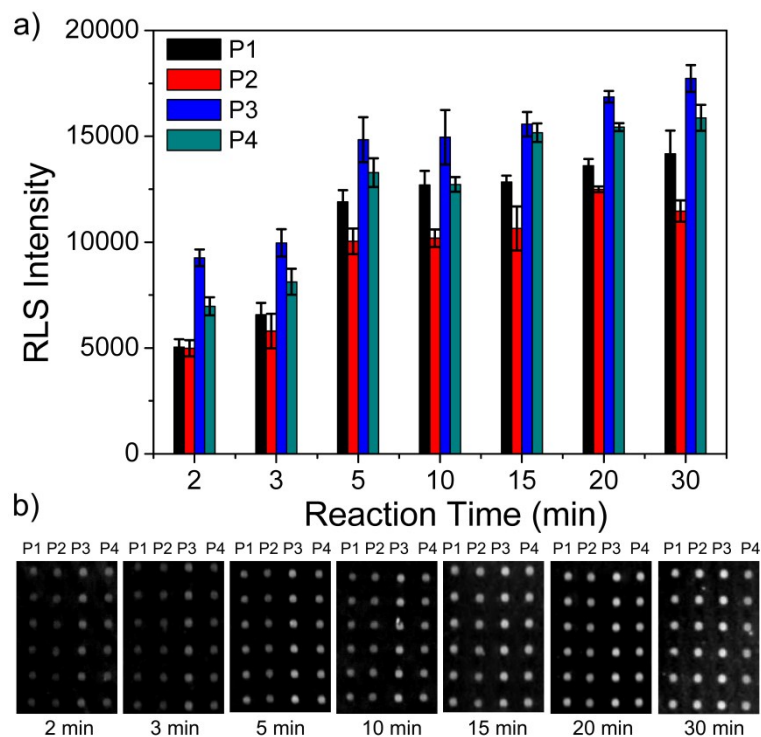

**Fig. S4.** RLS intensities (a) and corresponding images (b) of subarrays. The various gold deposition times are employed for enlargement of GNPs. The concentrations of  $\text{H}_2\text{O}_2$  and  $\text{HAuCl}_4$  are 0.05 M and 0.5 mM, respectively. The concentrations of probe ssDNAs are 10  $\mu\text{M}$  in spotting solution which are immobilized on the subarrays as indicated. The concentration of total DNAs in the target ssDNA cocktail (T1:T2:T3:T4=1:1:1:1) is 10 nM, respectively. The concentration of DNA-GNPs is 5 nM.

Both of the RLS intensity of subarray (S) and background noise (N) are increased with increasing of gold deposition time. Consideration of S/N and assay time, 5 minutes gold deposition is used in the following experiments.

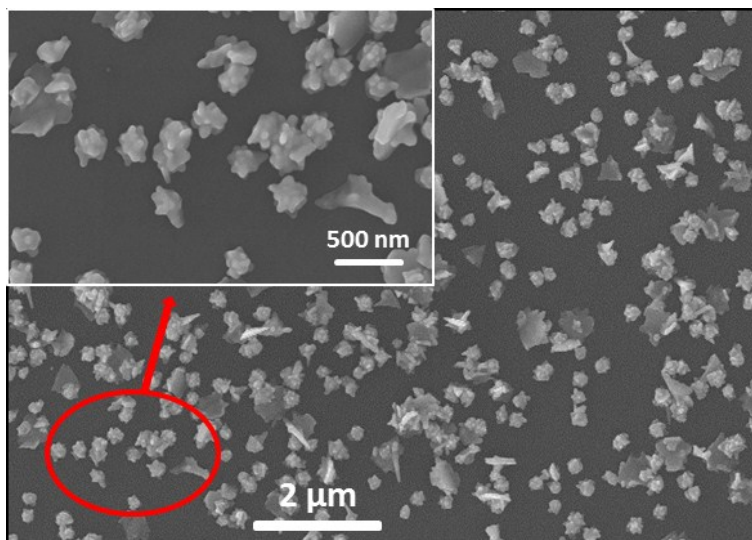

**Fig. S5.** SEM micrograph of enlarged GNPs.

The average size of GNPs is increased from 13 nm to 200 nm and the morphology of GNP change from sphere to irregular shape with rough surface.

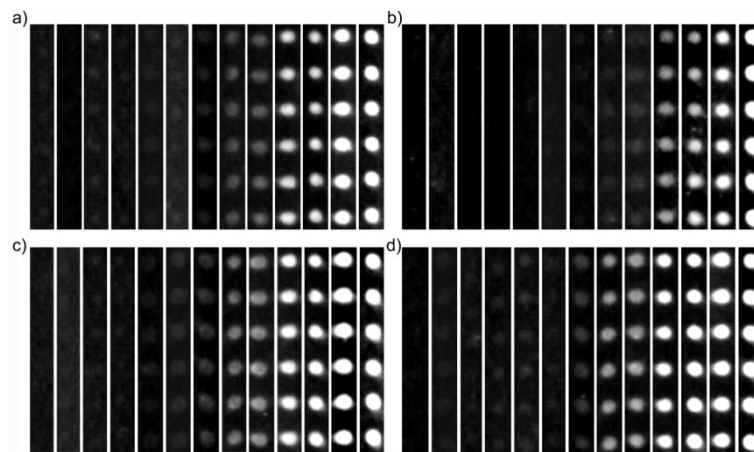

**Fig. S6.** RLS images as a function of allele frequency. (a) T1, (b) T2, (c) T3, (d) T4, respectively. The total concentration of mutant (T1 to T4) and wild-type (S1 to S4) target ssDNAs is 0.3 pmol in the 30  $\mu$ L hybridization buffer. The concentrations of probe ssDNAs (P1 to P4) are 10  $\mu$ M in spotting solution, respectively. The concentration of DNA-GNPs is 5 nM.

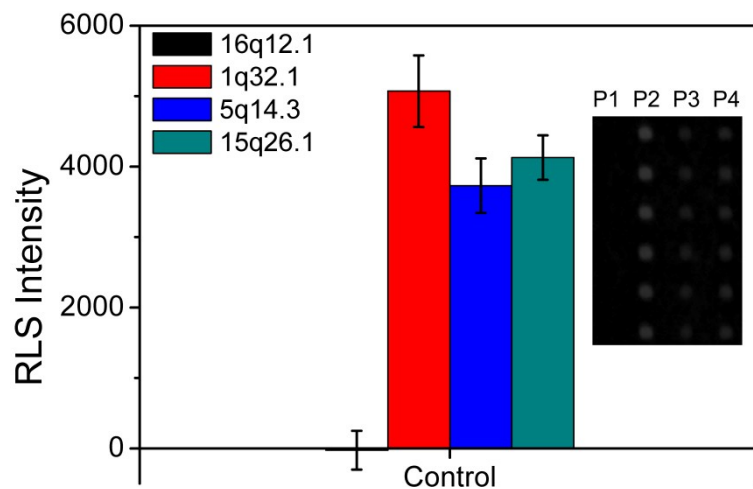

**Fig. S7.** The RLS images (inset) and corresponding data analysis of subarray. The subarray is hybridized with blank control (asymmetric PCR solution without template). The concentrations of probe ssDNAs (P1 to P4) are 10  $\mu$ M in spotting solution, respectively. The concentration of DNA-GNPs is 5 nM.

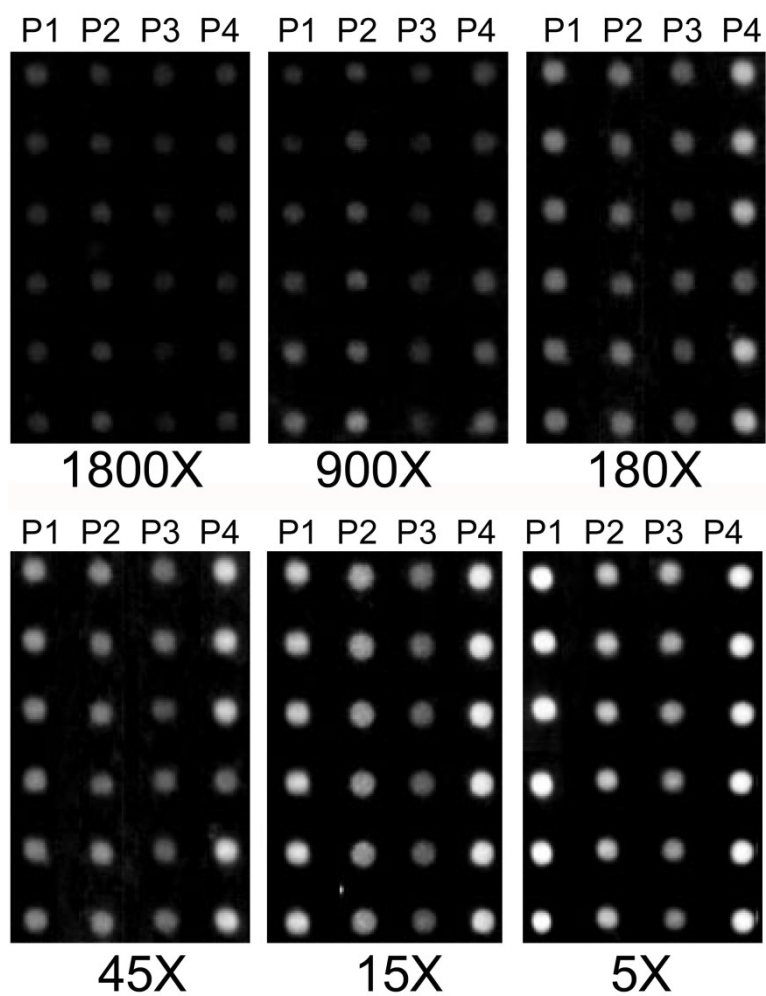

**Fig. S8.** The RLS images subarrays. The subarrays are hybridized with various times diluted asymmetric PCR products of MCF-7. The concentrations of probe ssDNAs (P1 to P4) are 10  $\mu$ M in spotting solution, respectively. The concentration of DNA-GNPs is 5 nM.

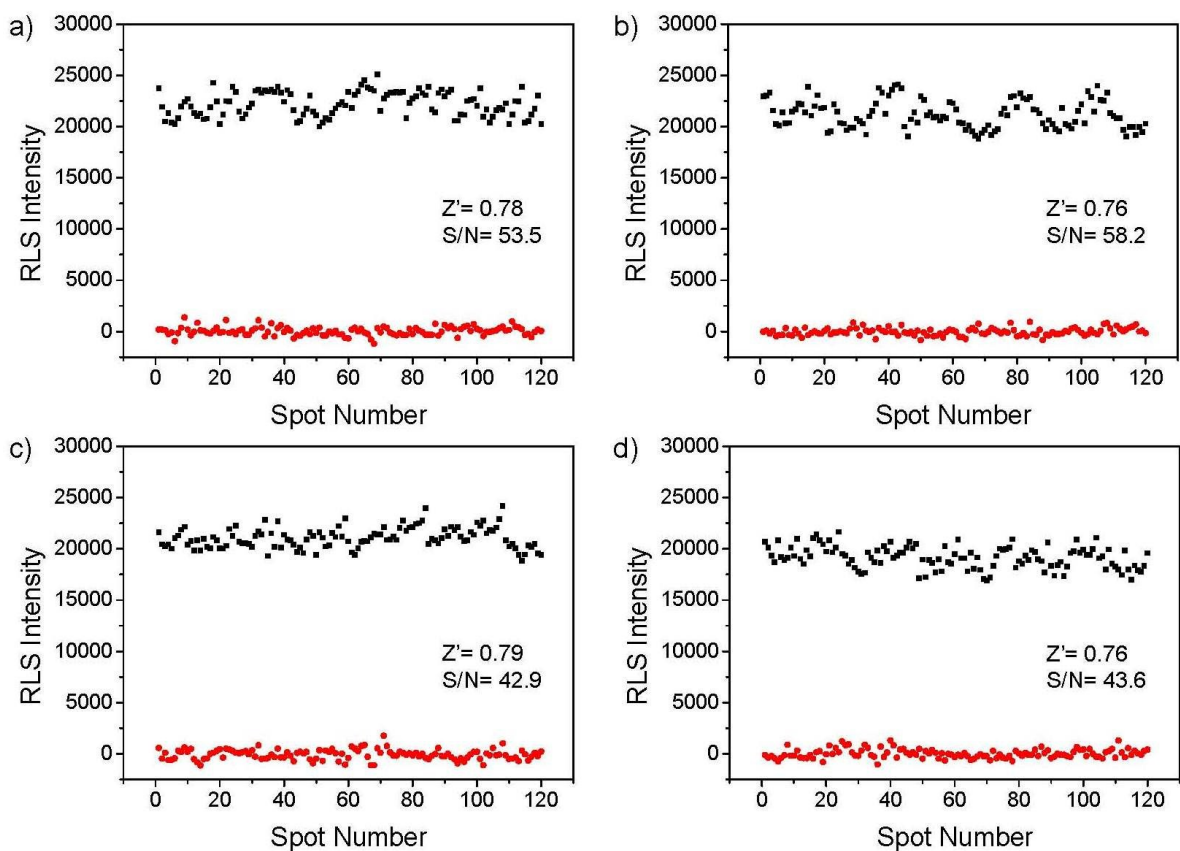

**Fig. S9.** Evaluation of the assay performance. RLS intensities (a) P1 hybridized with T1, (b) P2 hybridized with T2, (c) P3 hybridized with T3 and (d) P4 hybridized with T4 (black squares) are shown in comparison with control measurements (red dots), respectively. The concentrations of probe ssDNAs are 10  $\mu$ M in spotting solution. The concentration of total DNAs in the target ssDNA cocktail (T1:T2:T3:T4=1:1:1:1) is 10 nM, respectively. The concentration of DNA-GNPs is 5 nM. The mean values and standard deviations extracted from the data were used to calculate the S/N ratio and Z' factor. The hybridization buffer without target ssDNAs is used as control sample.
